# Supplementary material for: Synthesis, structural characterization and biological activity of two diastereomeric JA-Ile macrolactones
Source: Royal Society of Chemistry journal article supplement (doi:10.1039/c5ob00362h), 2015-01-01
Supplement: c5ob00362h1.pdf [file c5ob00362h1.pdf]

# Synthesis, structural characterization and biological activity of two diastereomeric JA-Ile macrolactones

## Supporting Information

Guillermo H. Jimenez-Aleman, Ricardo A.R. Machado, Helmar Görls, Mathias Erb,<sup>d</sup> Ian T. Baldwin and  
Wilhelm Boland

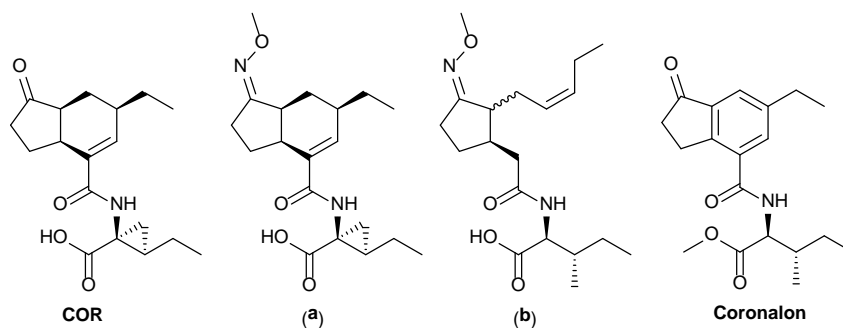

**Fig. S1** Chemical structure of coronatine (**COR**), coronatine methyloxime (**a**), JA-Ile-methyloxime (**b**) and coronalon.

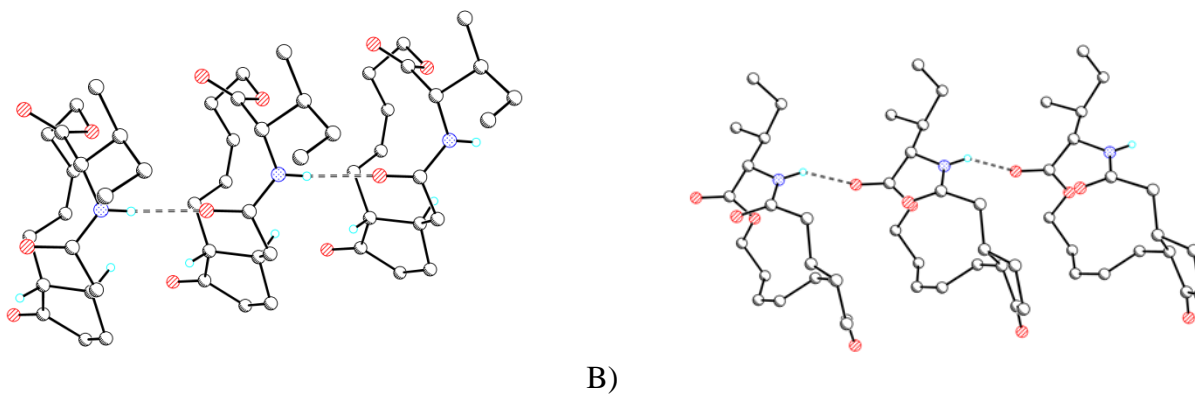

**Figure S2.** Both lactones show a chain-like packing. A) JA-Ile-lactone (**4a**). B) JA-Ile-lactone (**4b**)

## **COPY OF NMR SPECTRA OF IMPORTANT COMPOUNDS**

1 Compound (9)

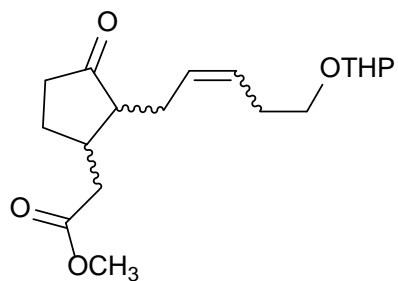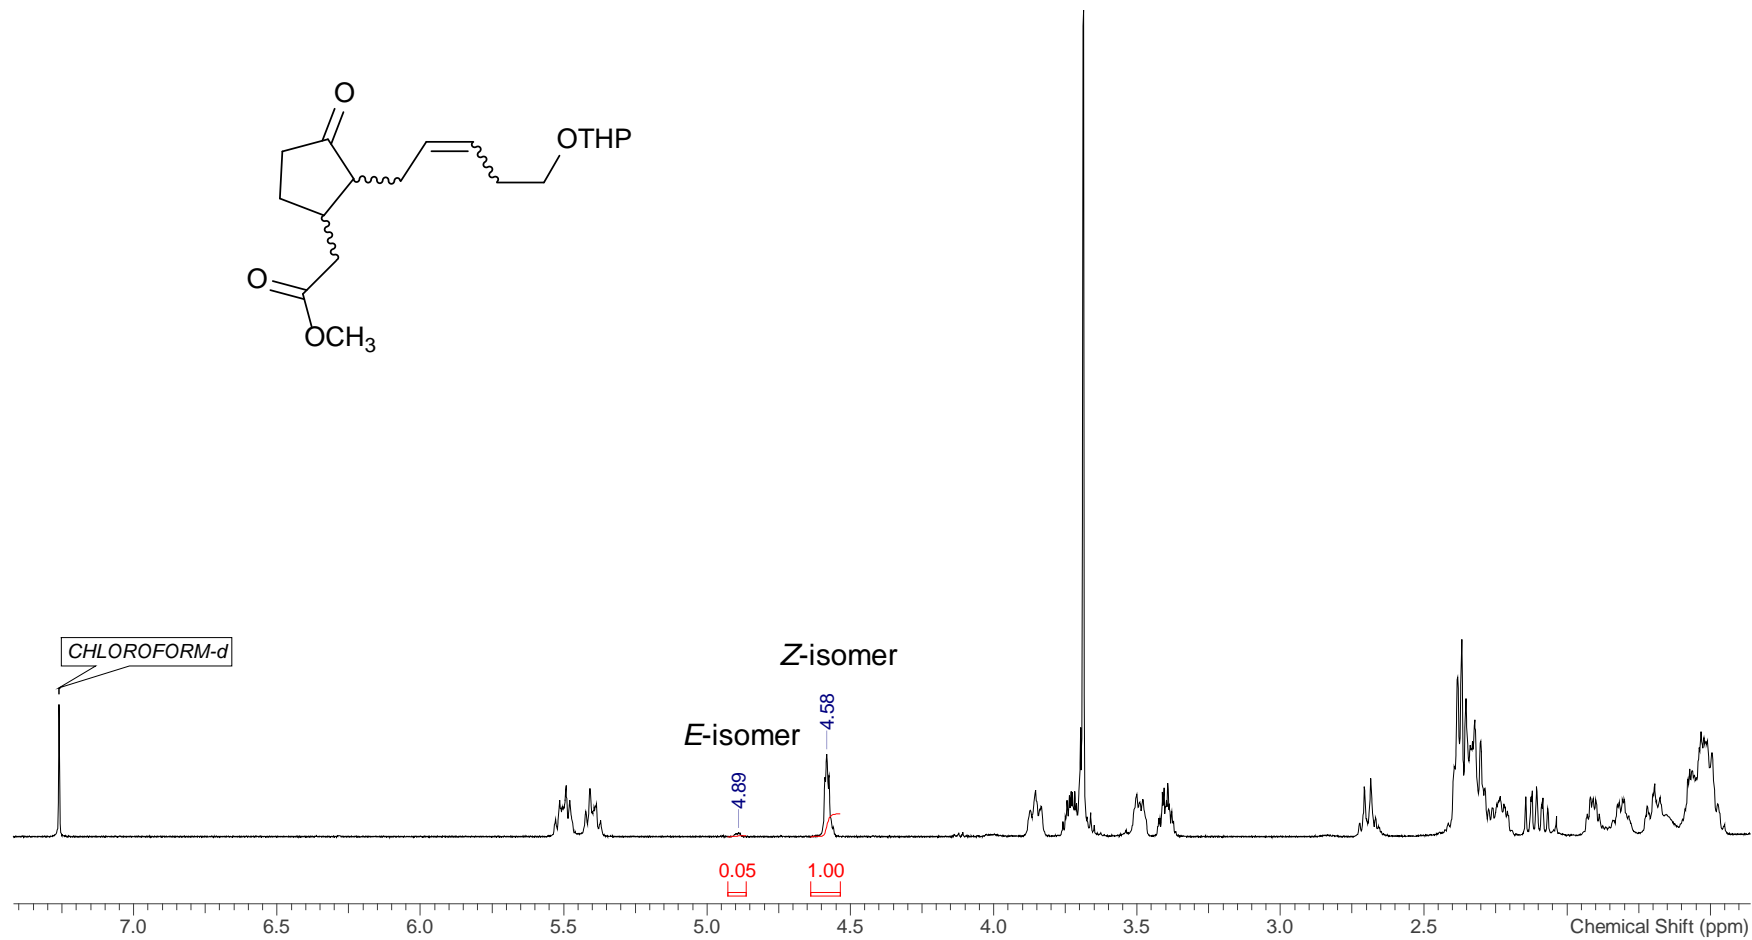

2

3 <sup>1</sup>H NMR in CDCl<sub>3</sub>.

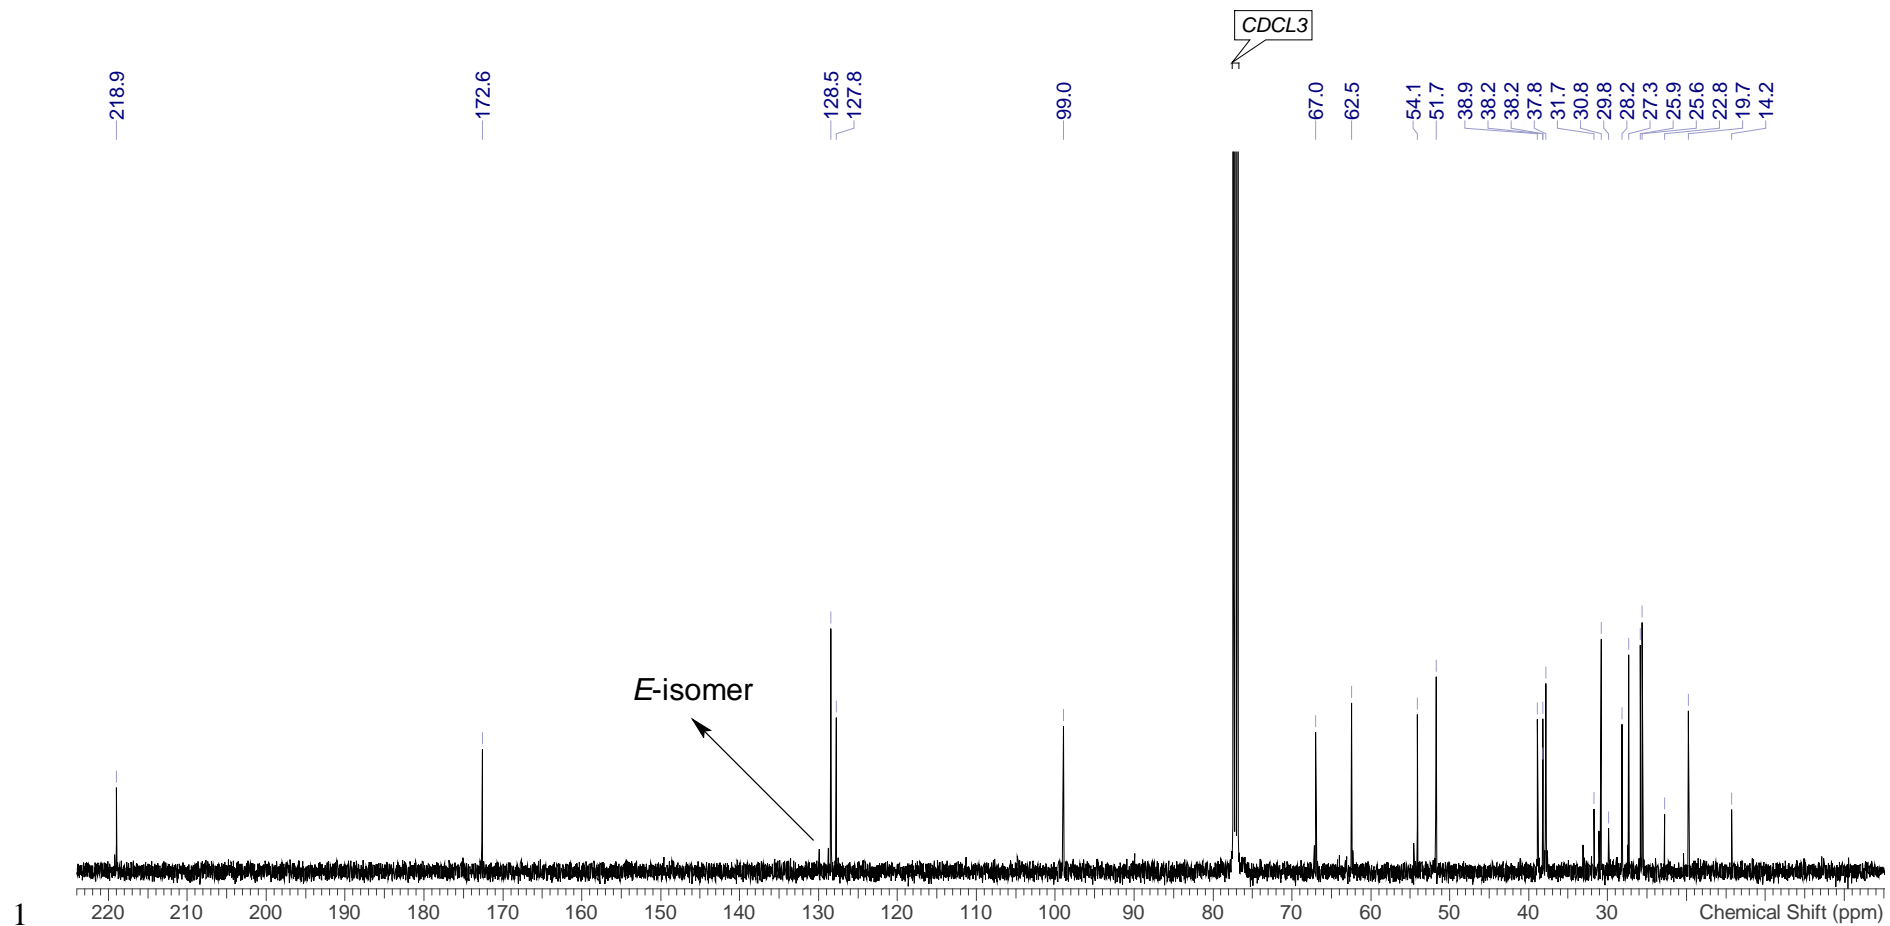

*E*-isomer

1

2 <sup>13</sup>C NMR in CDCl<sub>3</sub>.

3

4

5

6

1 12-OH-JA-Ile (3)

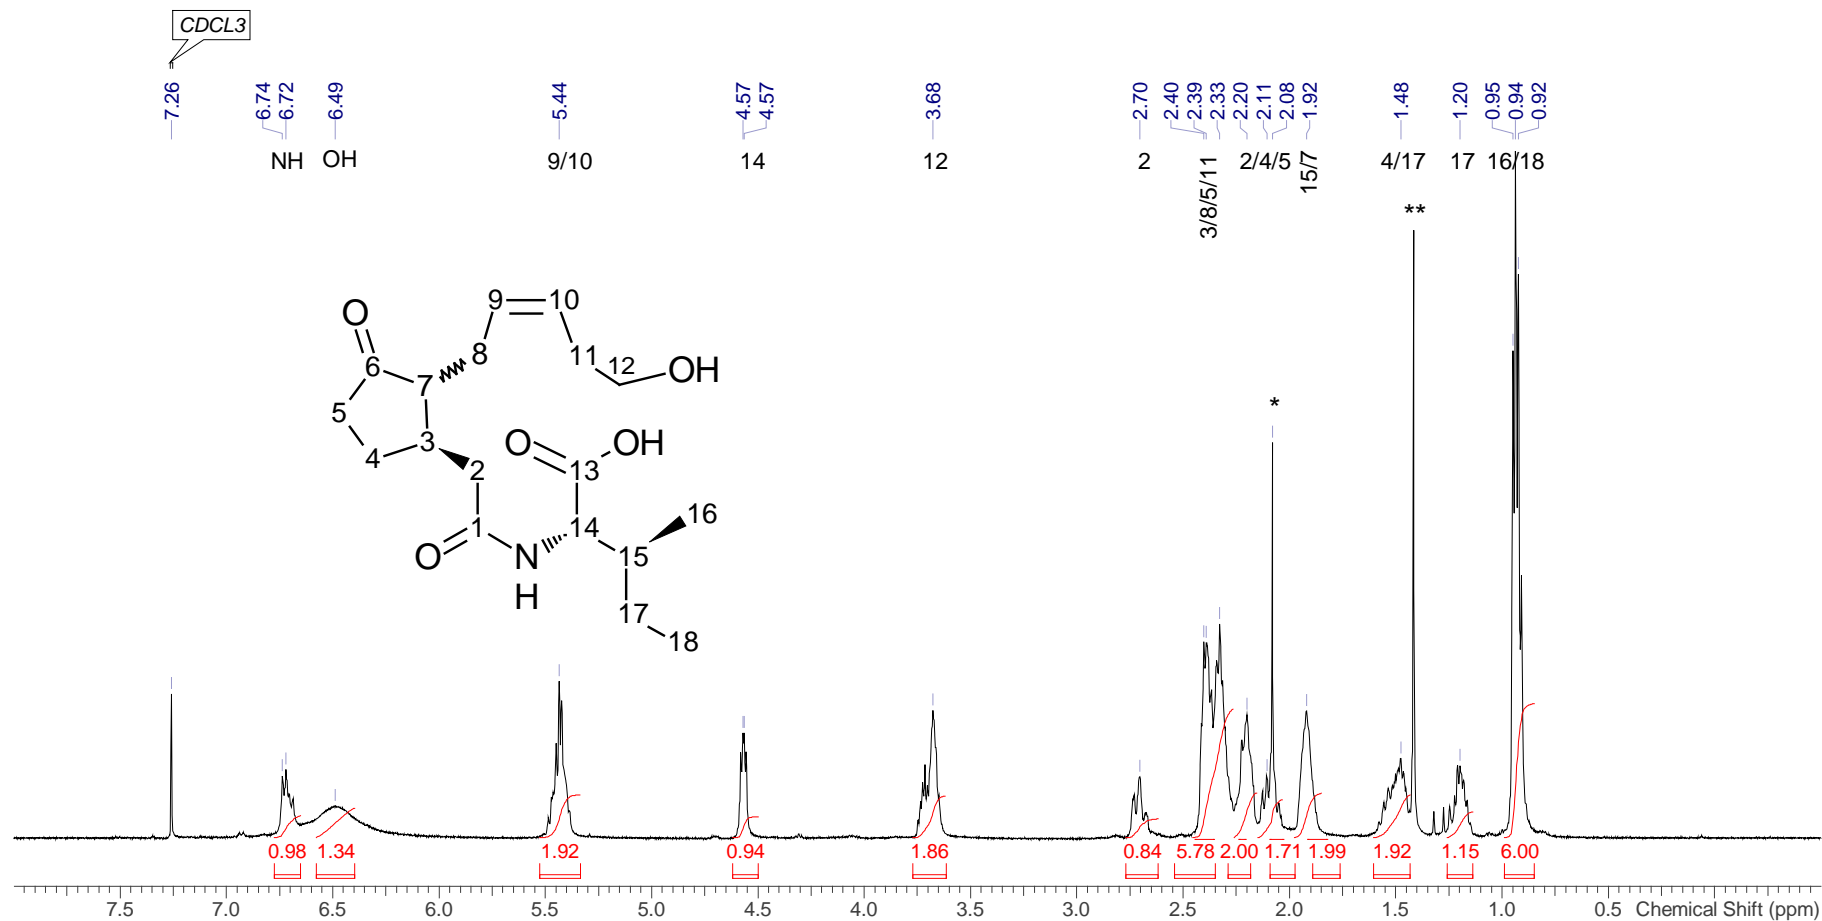

2

3 <sup>1</sup>H NMR in CDCl<sub>3</sub>. Asterisk denotes solvent impurities. \*AcOH; \*\*cyclohexane

4

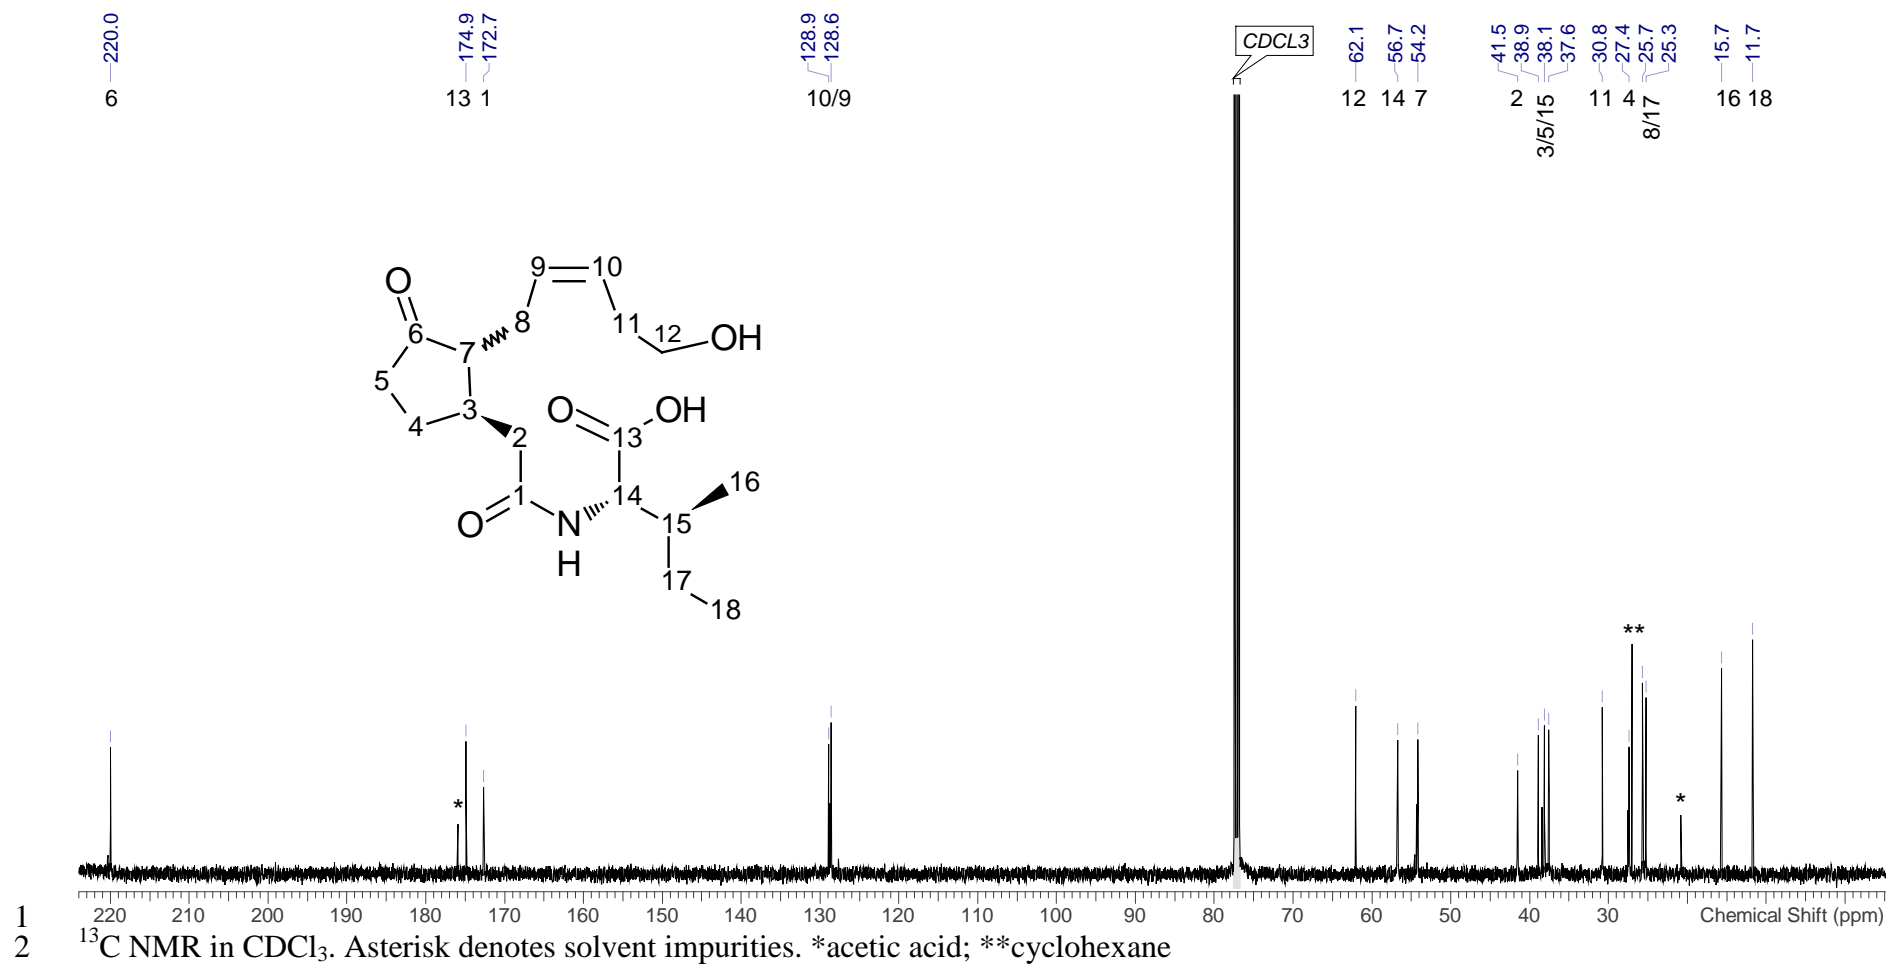

1  
2  
3  
4  
5  
6

1 JA-Ile-Lactone (**4a**)

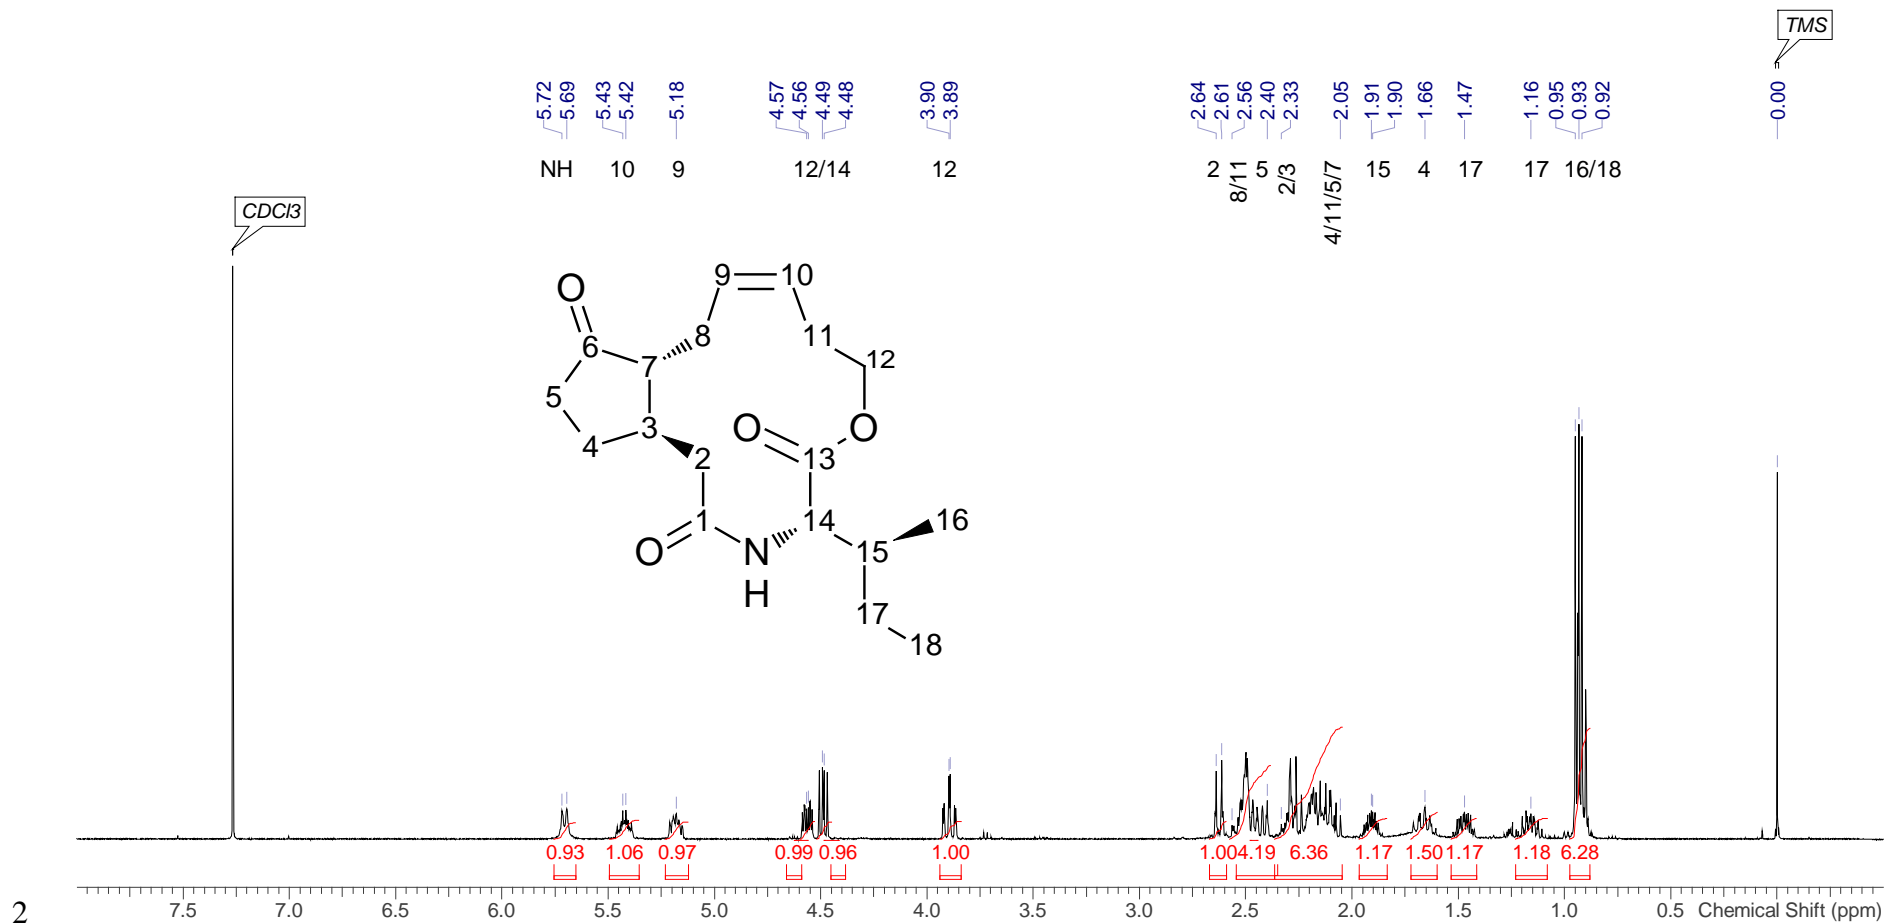

2  
3 <sup>1</sup>H NMR in CDCl<sub>3</sub>.

4

5

6

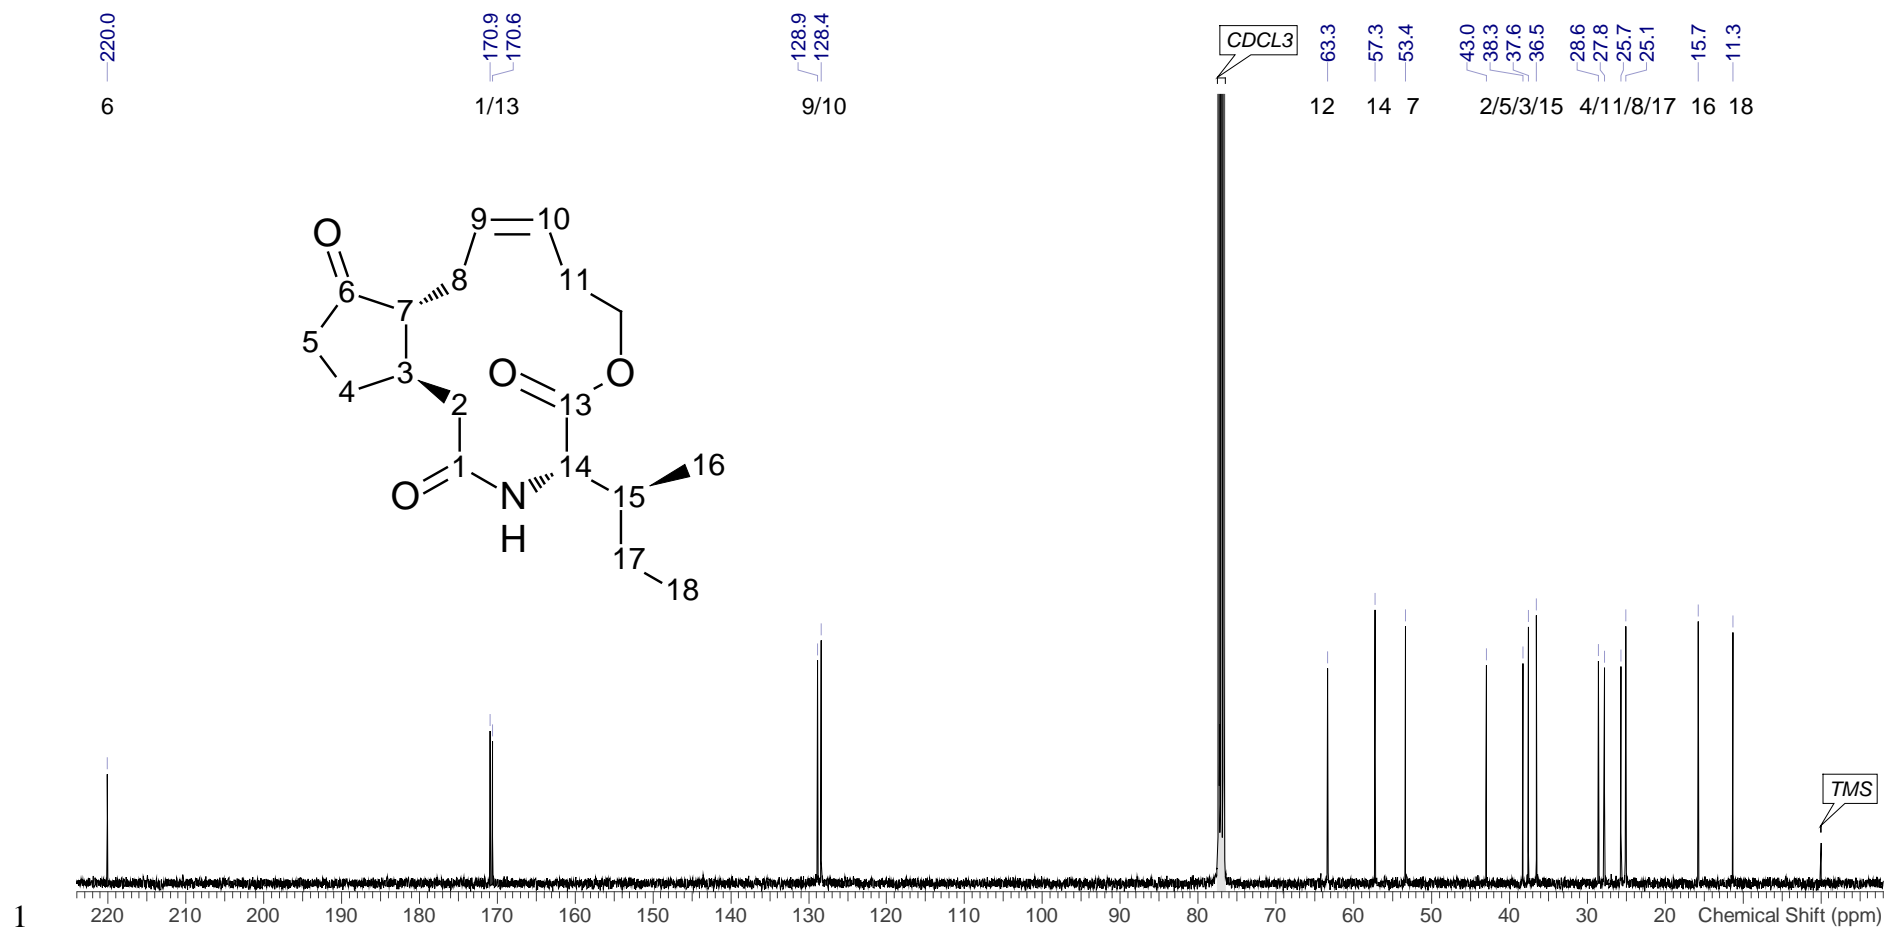

1  
2  $^{13}\text{C}$  NMR in  $\text{CDCl}_3$ .

3

4

5

6



1 JA-Ile-Lactone (**4b**)

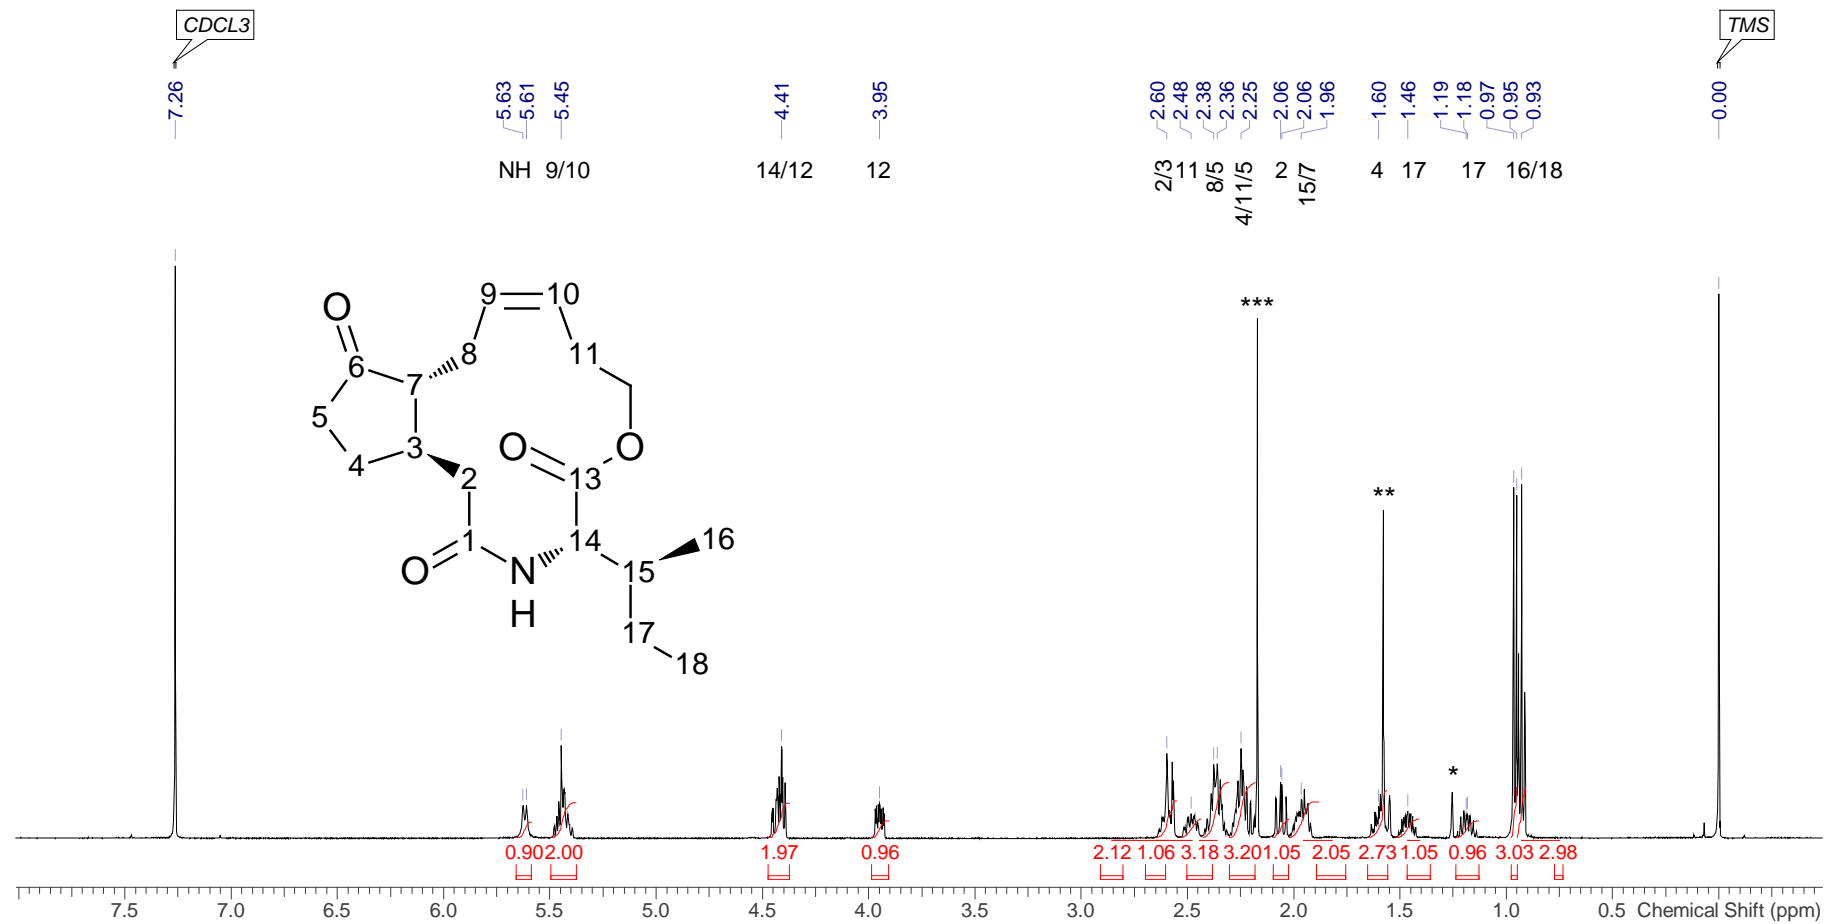

2

3 <sup>1</sup>H NMR in CDCl<sub>3</sub>. Asterisk denotes minor impurities. \*H grass; \*\* Water; \*\*\* Acetone

4

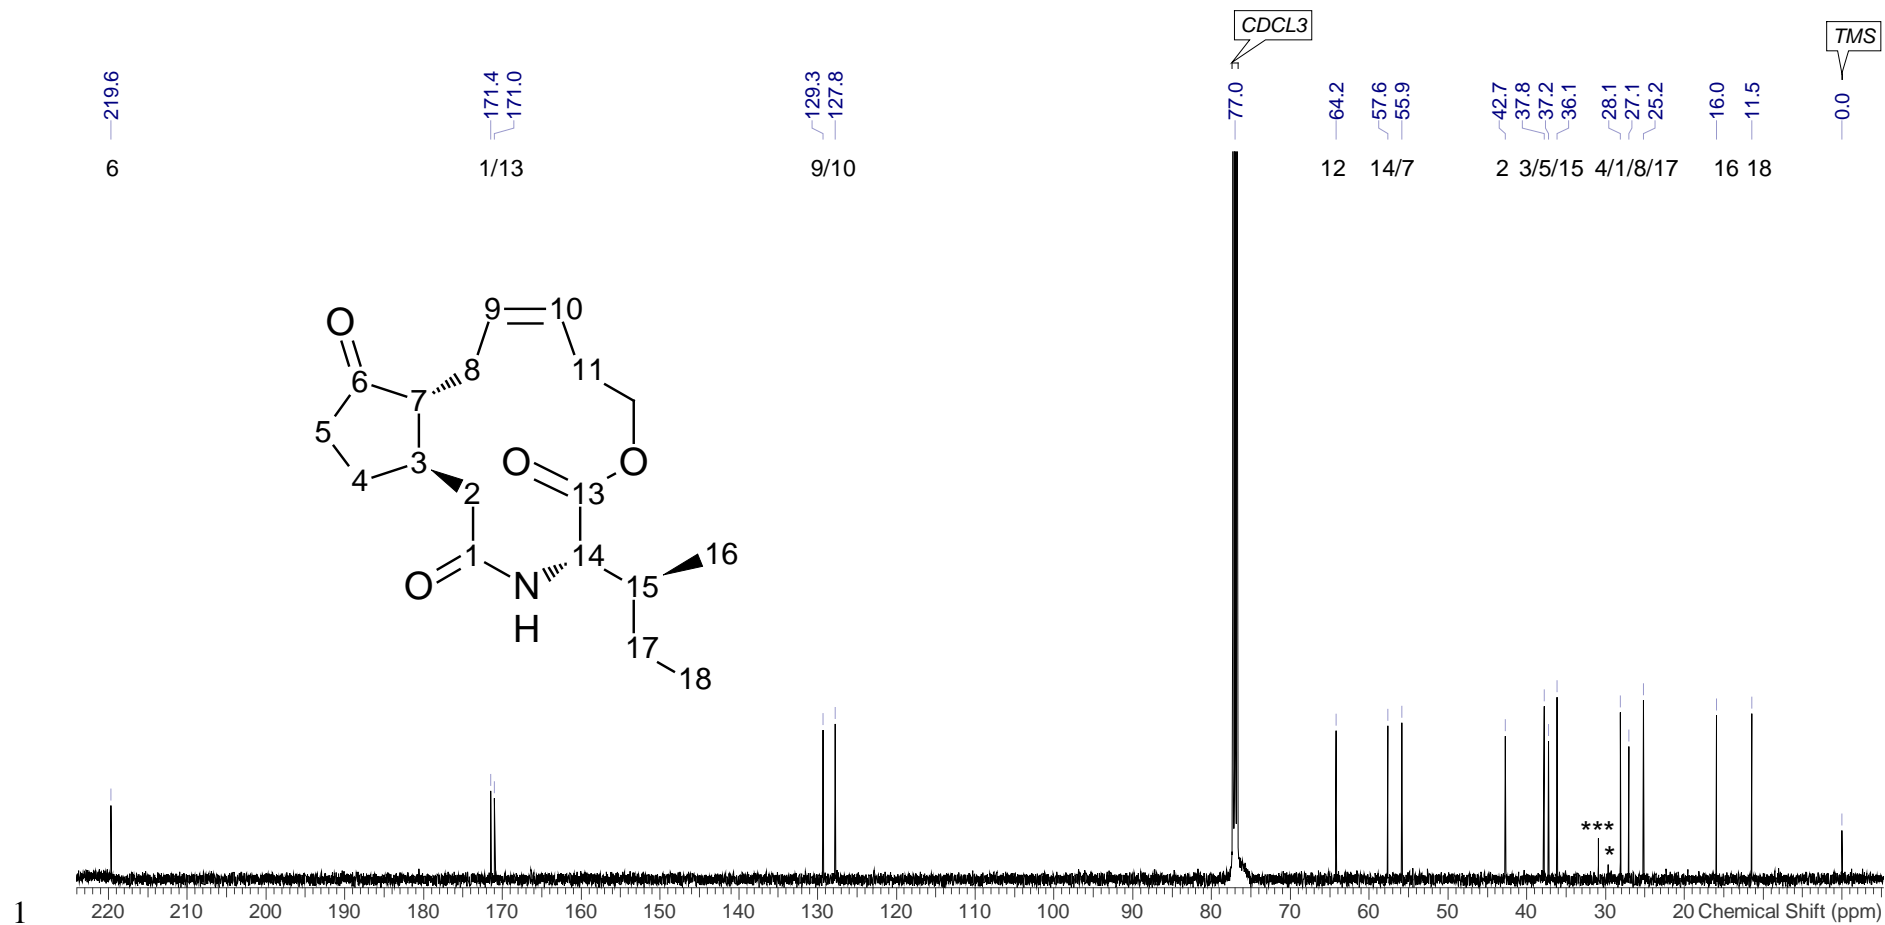

<sup>13</sup>C NMR in CDCl<sub>3</sub>. Asterisk denotes minor impurities. \*H grase; \*\*\*Acetone.
